# Supplementary material for: Bamboo Shoots Modulate Gut Microbiota, Eliminate Obesity in High-Fat-Diet-Fed Mice and Improve Lipid Metabolism
Source: MDPI journal article supplement (doi:10.3390/foods12071380), 2023-03-24
Supplement: s1 [file s1]

---

**Supplemental file**

# **Bamboo Shoots Modulate Gut Microbiota, Eliminate Obesity in High-Fat-Diet-Fed Mice and Improve Lipid Metabolism**

**Xiaolu Zhou, SolJu Pak, Daotong Li, Li Dong, Fang Chen, Xiaosong Hu and Lingjun Ma \***

National Engineering Research Center for Fruit and Vegetable Processing, Key Laboratory of Fruit and Vegetables Processing Ministry of Agriculture, College of Food Science and Nutritional Engineering, China Agricultural University, Beijing 100083, China; zxl782072778@163.com (X.Z.); ogj1991928@163.com (S.P.); lidaotong@bjmu.edu.cn (D.L.); li\_dong127@163.com (L.D.); chenfangch@sina.com (F.C.); huxiaos@263.net (X.H.)

\* Correspondence: lingjun.ma@cau.edu.cn; Tel.: +86-13693082607

## **This file includes:**

Figure S1. Effects of BS on (A) energy intake, (B) adipose cell size and (C) Liver histological score.

Figure S2. Effects of BS on the gut microbiota of mice at the phylum level: (A) Firmicutes, (B) Bacteroidota, (C) Proteobacteria, (D) Desulfobacterota and (E) Verrucomicrobia.

Figure S3. Cladogram generated from LEfSe analysis showing the relationship among taxa: (A) HFD vs. NCD (B) HFD-BS vs. HFD.

Figure S4. Linear discriminant analysis (LDA) scores derived from LEfSe analysis, showing the biomarker taxa LDA score of >3. (A) HFD vs. NCD (B) HFD-BS vs. HFD.

Table S1. Composition of bamboo shoot freeze-dried powder (g/100g).

Table S2. Reagents for experiment.

Table S3. Composition of experimental diets.

Table S4. Liver steatosis evaluation form.

Method S1. Gut microbiota analysis.

Method S2. Quantification of fecal short-chain fatty acids (SCFAs).

Method S3. Determination of metabolites in faces.

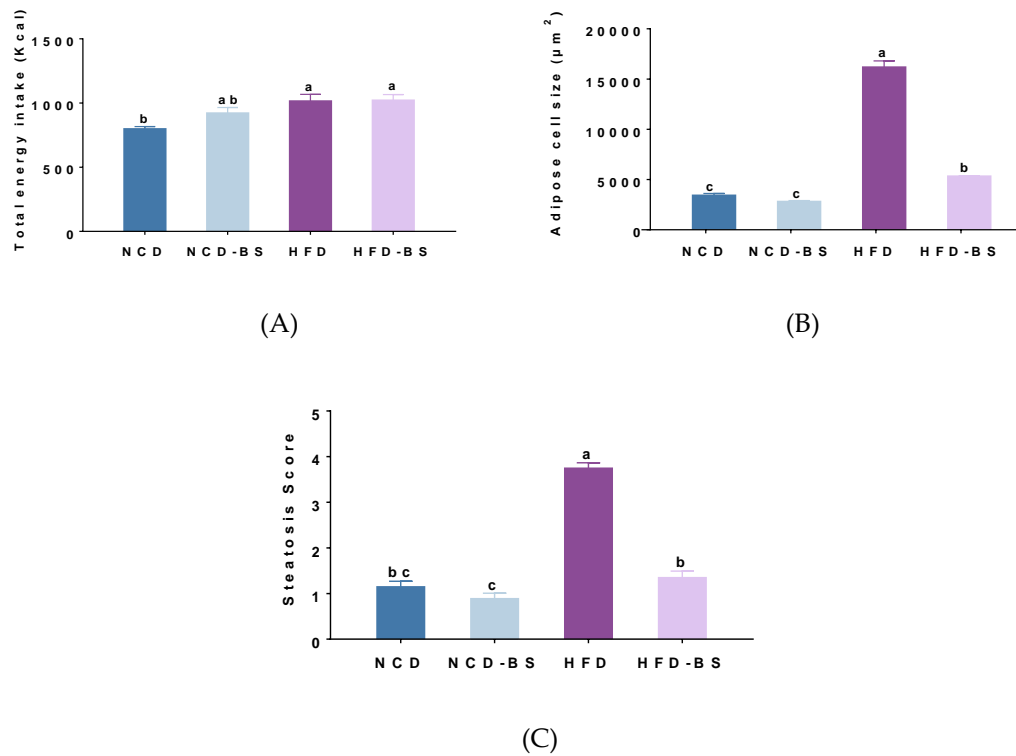

**Figure S1. Effects of BS on (A) energy intake, (B) adipose cell size and (C) Liver histological score.** Data presented as mean  $\pm$  SEM, n = 8 per group. Means denoted by a different letter (a, b, c) indicate significant differences between groups ( $p < 0.05$ ). NCD, normal control diet; NCD-BS, normal control diet supplemented with freeze-dried powder of bamboo shoots; HFD, high-fat diet; HFD-BS, high-fat diet supplemented with freeze-dried powder of bamboo shoots.

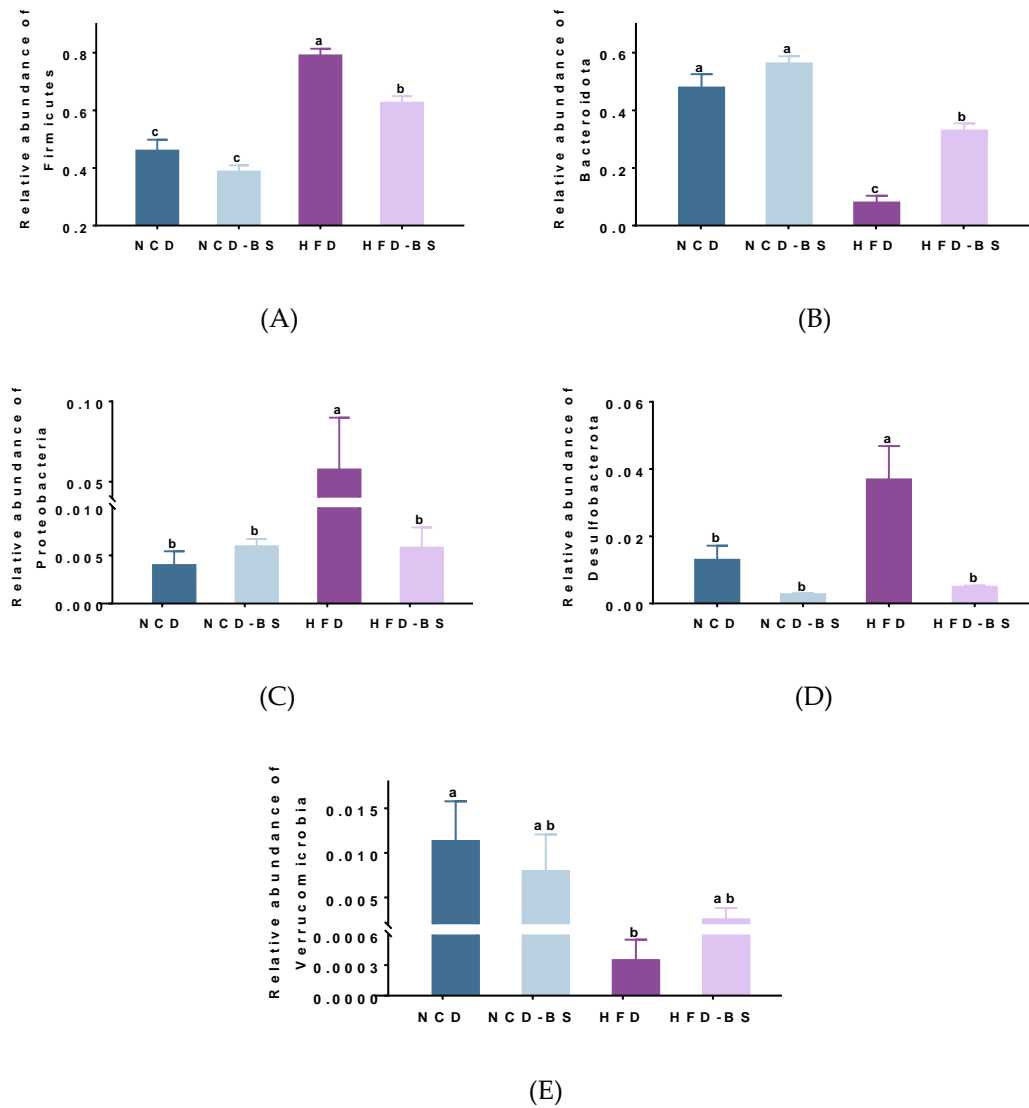

**Figure S2. Effects of BS on the gut microbiota of mice at the phylum level: (A) Firmicutes, (B) Bacteroidota, (C) Proteobacteria, (D) Desulfobacterota and (E) Verrucomicrobia.** Data presented as mean  $\pm$  SEM,  $n = 8$  per group. Means denoted by a different letter (a, b, c) indicate significant differences between groups ( $p < 0.05$ ). NCD, normal control diet; NCD-BS, normal control diet supplemented with freeze-dried powder of bamboo shoots; HFD, high-fat diet; HFD-BS, high-fat diet supplemented with freeze-dried powder of bamboo shoots.

## Cladogram

■ HFD  
■ NCD

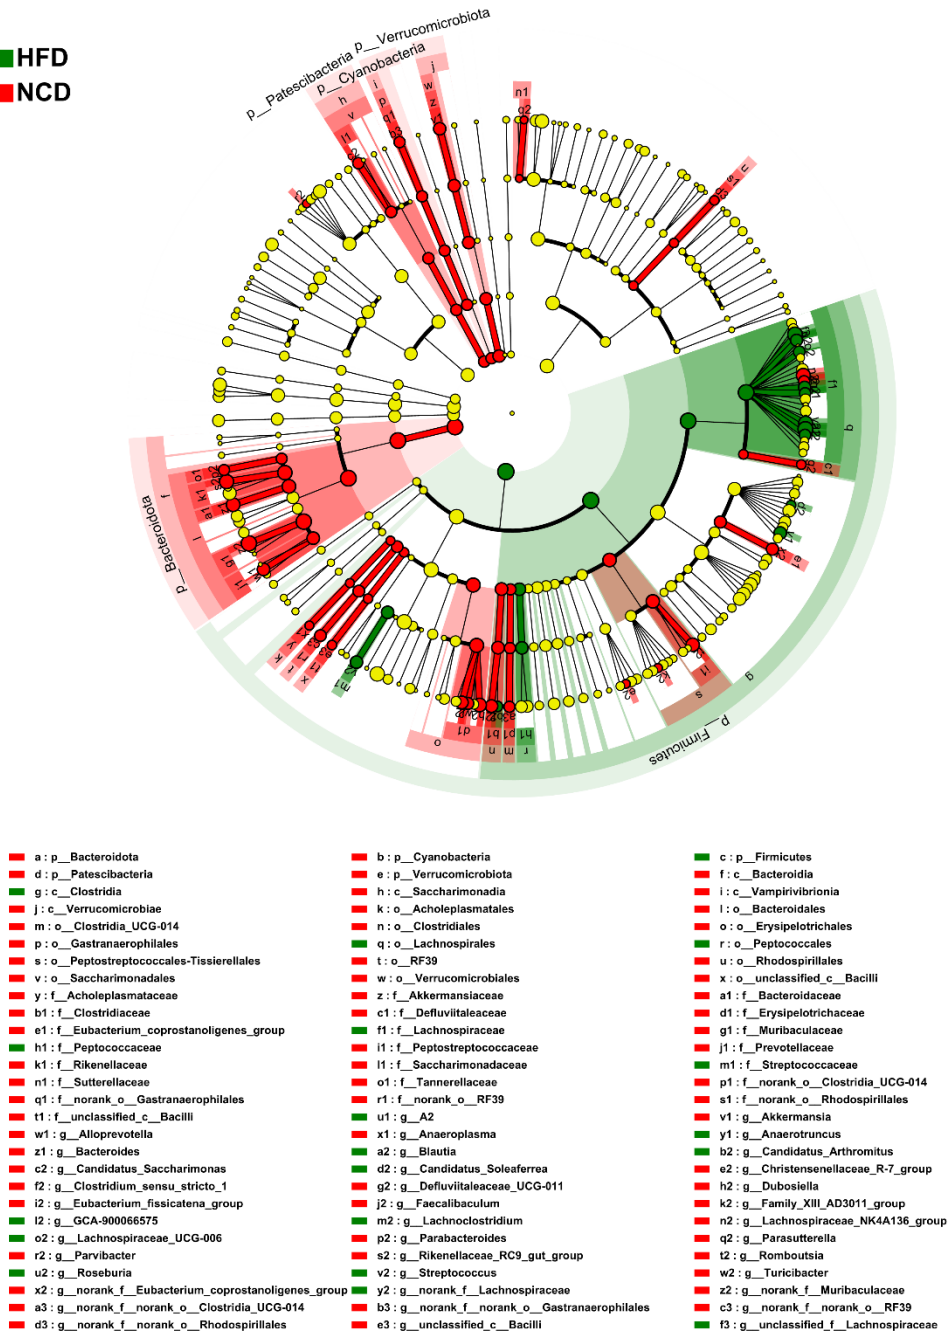

(A)

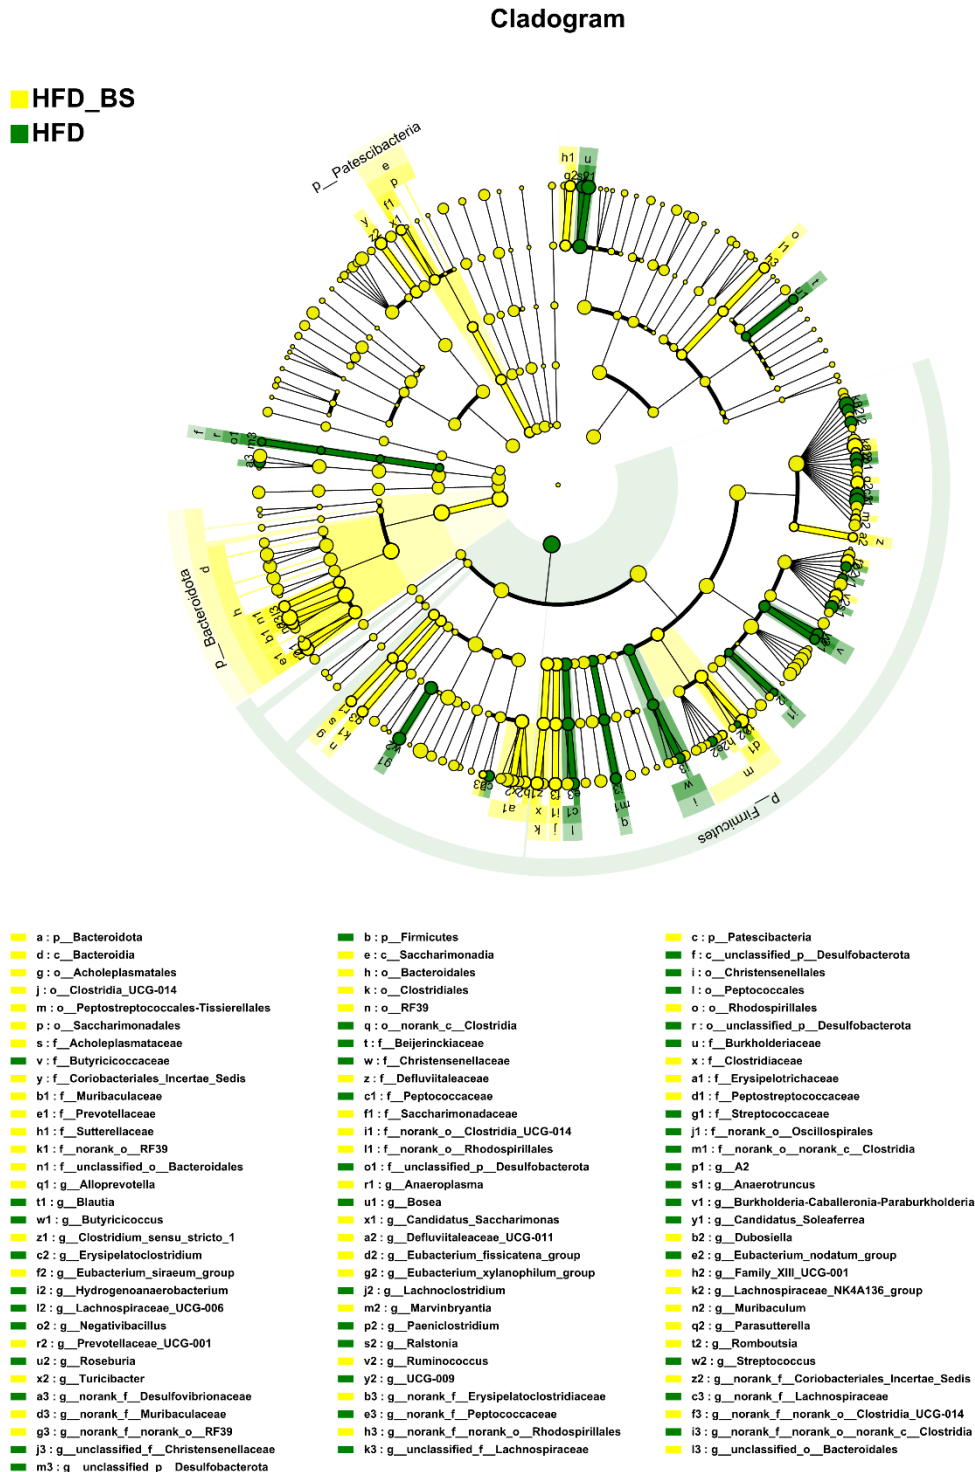

(B)

**Figure S3. Cladogram generated from LEfSe analysis showing the relationship among taxa: (A) HFD vs. NCD (B) HFD-BS vs. HFD.** LEfSe were assessed with the non-parametric factorial Kruskal–Wallis (KW) sum-rank test and show the abundances of the gut microbiota at the phylum to genus level. The differently colored nodes indicate microbial taxa that are

---

significantly enriched in the corresponding groups and have a significant effect on the differences between groups; the light-yellow nodes indicate microbial taxa that are not significantly different in any of the different groups or have no significant effect on the differences between groups. n =8 per group. NCD, normal control diet; NCD-BS, normal control diet supplemented with freeze-dried powder of bamboo shoots; HFD, high-fat diet; HFD-BS, high-fat diet supplemented with freeze-dried powder of bamboo shoots.

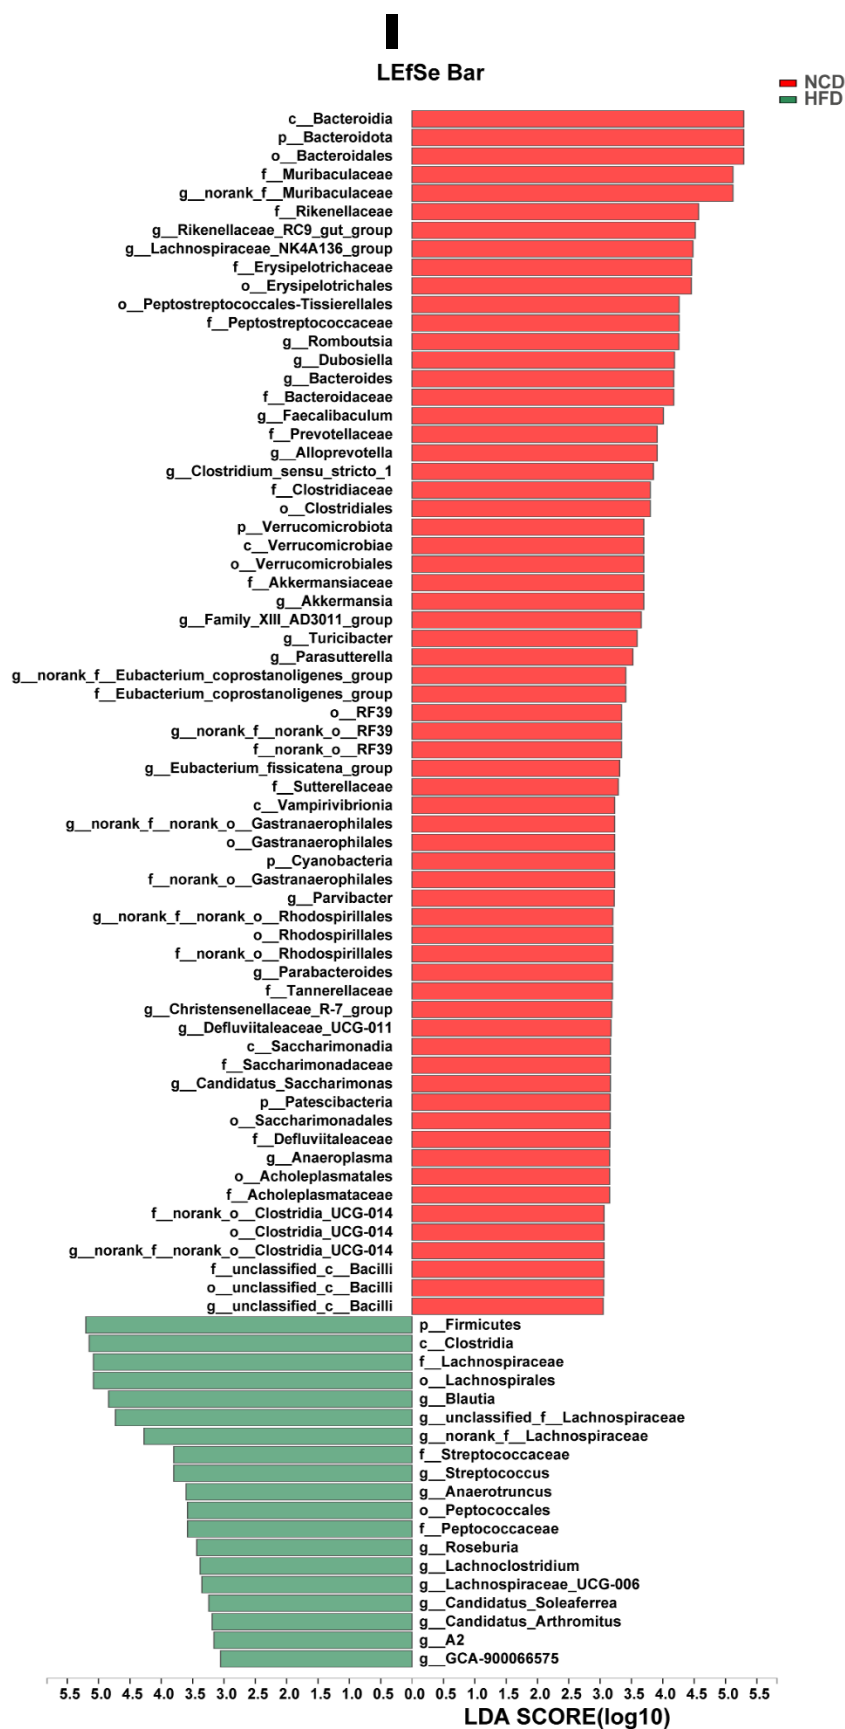

(A)

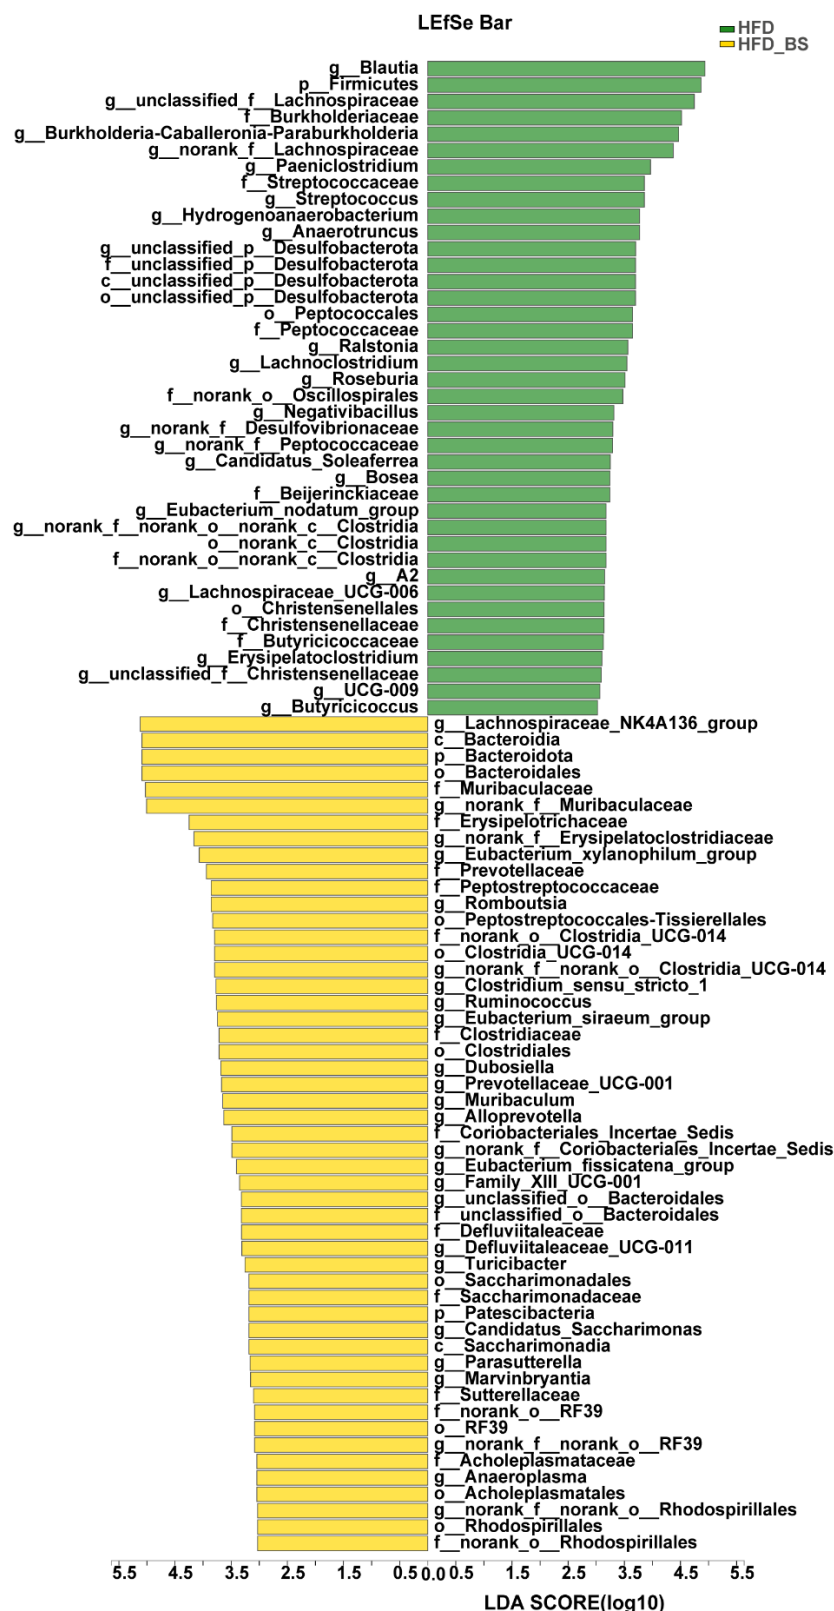

(B)

Figure S4. Linear discriminant analysis (LDA) scores derived from LEfSe analysis, showing a biomarker taxa LDA score of >3. (A) HFD vs. NCD (B) HFD-BS vs. HFD. LDA discriminant



---

bar chart by LDA scores obtained via LDA analysis (linear regression analysis); the higher the LDA score, the greater the effect of species abundance on the differential effect. It was possible to count the microbial taxa that had a significant effect in multiple groups. n=8 per group. NCD, normal control diet; NCD-BS, normal control diet supplemented with freeze-dried powder of bamboo shoots; HFD, high-fat diet; HFD-BS, high-fat diet supplemented with freeze-dried powder of bamboo shoots.

**Table S1. Composition of bamboo shoot freeze-dried powder (g/100g).**

| Nutrient content        | Dry weight |
|-------------------------|------------|
| Total dietary fiber     | 26.60±0.40 |
| Insoluble dietary fiber | 25.70±1.17 |
| Soluble dietary fiber   | 0.90±1.56  |
| Protein                 | 41.80±0.99 |
| Fat                     | 2.43±0.03  |
| Carbohydrate            | 12.17±0.60 |
| Moisture                | 2.90±0.06  |
| Ash                     | 14.10±0.04 |

Data are expressed as mean ± standard deviation (n = 3).

**Table S2. Reagents for experiment.**

| Reagent           | Manufacturer                  | Purity level          |
|-------------------|-------------------------------|-----------------------|
| Acetic acid       | Sigma-aldrich Company, USA    | chromatographic grade |
| Propionic acid    | Sigma-aldrich Company, USA    | chromatographic grade |
| Butyric acid      | Sigma-aldrich Company, USA    | chromatographic grade |
| Isobutyric acid   | Sigma-aldrich Company, USA    | chromatographic grade |
| Pentanoic acid    | Sigma-aldrich Company, USA    | chromatographic grade |
| Isovaleric acid   | Sigma-aldrich Company, USA    | chromatographic grade |
| Diethyl ether     | Sinopharm Chemical Reagent Co | analytical grade      |
| Anhydrous ethanol | Sinopharm Chemical Reagent Co | analytical grade      |
| Methanol          | Sinopharm Chemical Reagent Co | analytical grade      |

**Table S3. Composition of experimental diets<sup>a</sup>.**

| <b>Ingredient (g/kg)</b>            | <b>NCD<sup>b</sup></b> | <b>NCD-BS</b> | <b>HFD</b> | <b>HFD-BS</b> |
|-------------------------------------|------------------------|---------------|------------|---------------|
| Lyophilized powder of bamboo shoots | 0                      | 150.00        | 0          | 150.00        |
| Casein, 80 Mesh                     | 189.56                 | 114.02        | 258.45     | 182.90        |
| L-Cystine                           | 2.84                   | 2.84          | 3.88       | 3.88          |
| Corn Starch                         | 479.79                 | 457.11        | 0.00       | 0.00          |
| Maltodextrin 10                     | 118.48                 | 118.48        | 161.53     | 139.55        |
| Sucrose                             | 73.74                  | 73.74         | 88.91      | 88.91         |
| Cellulose                           | 47.39                  | 0.00          | 64.61      | 16.54         |
| Soybean Oil                         | 23.70                  | 19.31         | 32.31      | 27.91         |
| Lard                                | 18.96                  | 18.96         | 316.60     | 316.60        |
| Mineral Mix, S10026                 | 9.48                   | 9.48          | 12.92      | 12.92         |
| DiCalcium Phosphate                 | 12.32                  | 12.32         | 16.80      | 16.80         |
| Calcium Carbonate                   | 5.21                   | 5.21          | 7.11       | 7.11          |
| Potassium Citrate, 1 H2O            | 15.64                  | 15.64         | 21.32      | 21.32         |
| Vitamin Mix, V10001C                | 0.95                   | 0.95          | 12.92      | 12.92         |
| Choline Bitartrate                  | 1.90                   | 1.90          | 2.58       | 2.58          |
| FD&C Blue Dye                       | 0.01                   | 0.01          | 0.00       | 0.00          |
| FD&C Yellow Dye                     | 0.04                   | 0.04          | 0.00       | 0.00          |
| FD&C Blue Dye #1                    | 0.00                   | 0.00          | 0.005      | 0.005         |
| <b>% Energy and source</b>          |                        |               |            |               |
| Protein                             | 20                     | 20            | 20         | 20            |
| Carbohydrate                        | 70                     | 70            | 20         | 20            |
| Fat                                 | 10                     | 10            | 60         | 60            |

<sup>a</sup> Diet formulae of NCD and HFD. The ingredients were obtained from Shuyishuer Biotech Co., Ltd, Changzhou, China.

<sup>b</sup> NCD, normal control diet; NCD-BS, normal control diet supplemented with Qiong bamboo shoot freeze-dried powder; HFD, high-fat diet; HFD-BS, high-fat diet supplemented with Qiong bamboo shoot freeze-dried powder.

Table S4. Liver steatosis evaluation form.

| Degree of<br>Liver<br>Steatosis | Score   | Evaluation criteria                                                                                                                                                                                                                                                                                                                                                                                                    |
|---------------------------------|---------|------------------------------------------------------------------------------------------------------------------------------------------------------------------------------------------------------------------------------------------------------------------------------------------------------------------------------------------------------------------------------------------------------------------------|
| Normal                          | 0.0-1.0 | The liver peritoneum is intact, the whole liver is stained pink, and the boundaries between hepatocyte cords are clear; the hepatocytes are slightly swollen, the cytoplasmic boundaries are obvious, the intracytoplasmic granularity is not obvious, and small vacuoles (formed by the dissolution of lipid droplets) occasionally appear in the cytoplasm of individual cells.                                      |
| Mild                            | 1.0-2.0 | The liver is intact, the whole liver is stained pink, the intercellular boundary of hepatocytes is clear; the hepatocytes are swollen to some extent, the cytoplasmic boundary is still obvious, the intracytoplasmic granularity is obvious, some cells have small vacuoles in the cytoplasm, and the number of vacuoles is obviously increased compared with a normal liver.                                         |
| Moderate                        | 2.0-3.0 | The liver is intact, the whole liver is stained light pink, the intercellular boundary of hepatocytes is still clear; the hepatocytes are obviously swollen, the cytoplasmic boundary is no longer obvious, the intracytoplasmic granularity is obvious, the sinusoidal gap is narrowed, many small vacuoles appear in the cytoplasm of most cells, and some of the small vacuoles have fused to form larger vacuoles. |
| Severe                          | 3.0-4.0 | The liver is intact, the whole liver is stained with a very light pink color, the boundary between hepatocyte cords is not very clear; the hepatocytes are highly swollen, the cytoplasmic boundary is no longer obvious, the sinusoidal gap is almost gone, there are large vacuoles (formed by the fusion of many vacuoles after the dissolution of small lipid droplets) in the cytoplasm of most of the cells.     |

## Method S1. Gut Microbiota Analysis.

Total microbial genomic DNA was extracted from fecal samples using the E.Z.N.A.® soil DNA Kit (Omega Bio-tek, Norcross, GA, U.S.) according to manufacturer's instructions. The quality and concentration of DNA were determined via 1.0% agarose gel electrophoresis and a NanoDrop® ND-2000 spectrophotometer (Thermo Scientific Inc., USA) and kept at -80 °C prior to further use. The hypervariable region V3-V4 of the bacterial 16S rRNA gene were amplified with primer pairs 338F (5'-ACTCCTACGGGAGGCAGCAG-3') and 806R (5'-GGACTACHVGGGTWTCTAAT-3') by an ABI GeneAmp® 9700 PCR thermocycler (ABI, CA, USA). The PCR reaction mixture included 4 µL of 5 × Fast Pfu buffer, 2 µL of 2.5 mM dNTPs, 0.8 µL of each primer (5 µM), 0.4 µL of Fast Pfu polymerase, 10 ng of template DNA and ddH<sub>2</sub>O with a final volume of 20 µL. PCR amplification cycling conditions were as follows: initial denaturation at 95 °C for 3 min, followed by 27 cycles of denaturing at 95 °C for 30 s, annealing at 55 °C for 30 s and extension at 72 °C for 45 s, and single extension at 72 °C for 10 min and ending at 4 °C. All samples were amplified in triplicate. The PCR product was extracted from 2% agarose gel and purified using the AxyPrep DNA Gel Extraction Kit (Axygen Biosciences, Union City, CA, USA) according to the manufacturer's instructions and quantified using Quantus™ Fluorometer (Promega, USA).

Purified amplicons were pooled in equimolar amounts and pair-end-sequenced on an Illumina MiSeq PE300 platform/NovaSeq PE250 platform (Illumina, San Diego, USA) according to the standard protocols of Majorbio Bio-Pharm Technology Co. Ltd. (Shanghai, China).

Raw FASTQ files were de-multiplexed using an in-house Perl script, and then quality-filtered using fastp version 0.19.6 and merged using FLASH version 1.2.7 with the following criteria: (i) the 300 bp reads were truncated at any site receiving an average quality score of < 20 over a 50 bp sliding window, and truncated reads shorter than 50 bp and reads containing ambiguous characters were discarded; (ii) only overlapping sequences longer than 10 bp were assembled according to their overlapped sequence. The maximum mismatch ratio of overlap region was 0.2. Reads that could not be assembled were discarded; (iii) samples were distinguished according to barcode and primers, and the sequence direction was adjusted via exact barcode matching, with two nucleotide mismatches found in primer matching. Then, the optimized sequences were clustered into operational taxonomic units (OTUs) using UPARSE 7.1 with 97% sequence similarity level. The most abundant sequence for each OTU was selected as a representative sequence. The OTU table was manually filtered, i.e., chloroplast sequences in all samples were removed. To minimize the effects of sequencing depth on alpha and beta diversity, the number of 16S rRNA gene sequences from each sample was rarefied to 20,000, which still yielded an average Good's coverage of 99.09%, respectively. The taxonomy of each OTU representative sequence was analyzed via RDP Classifier version 2.2 against the 16S rRNA gene database (e.g., Silva v138) using a confidence threshold of 0.7.

Bioinformatic analysis of the gut microbiota was carried out using the Majorbio Cloud platform (<https://cloud.majorbio.com>). The alpha diversity analysis was performed using Mothur (version V. 1.30.2). Both nonmetric multidimensional scaling (NMDS) and principal coordinate analysis (PCoA) were applied to quantify the compositional differences between the microbial communities based on Bray–Curtis dissimilarity using Vegan v2.5-3 package. ANOSIM analysis was used to test for significant differences in clusters among the groups. The relative abundances of different bacterial communities were assessed with the Wilcoxon rank-sum test at a confident level of 95%, which was corrected using a false discovery rate (FDR). Linear discriminant analysis (LDA) effect size (LEfSe) (<http://huttenhower.sph.harvard.edu/LEfSe>) was performed to identify the significantly abundant taxa (phylum to genus) of bacteria among the different groups (LDA score > 3,  $p <$

0.05, FDR corrected). LEfSe were assessed with the non-parametric factorial Kruskal–Wallis (KW) sum-rank test.

### Method S2. Quantification of fecal short-chain fatty acids (SCFAs).

SCFAs were first extracted by mixing 100 mg of fresh mouse feces with 800  $\mu$ L of distilled water, 200  $\mu$ L of 50% concentrated sulfuric acid and 1 mL of ether. The mixture was shaken for 5 min, vortexed and centrifuged at 12,000  $\times$  g for 10 min, followed by dehydration with anhydrous  $\text{CaCl}_2$  and aspiration of the supernatant over a membrane (0.22  $\mu$ m, nylon membrane). The analysis was carried out via Shimadzu gas chromatography using an SH-Stabilwax-DA capillary column (30 m  $\times$  0.32 mm  $\times$  0.25  $\mu$ m) with a solvent delay time of 2 min. The initial temperature was held at 90  $^{\circ}\text{C}$  for 2 min, followed by an increase to 220  $^{\circ}\text{C}$  at 15  $^{\circ}\text{C}/\text{min}$  for 5 min. The detector temperature was set at 175  $^{\circ}\text{C}$  and the carrier gas was He (1.0 mL/min). Data were acquired using SIM mode and Shimadzu workstation software.

Acetic acid, propionic acid, butyric acid, isobutyric acid, n-valeric acid and isovaleric acid standards were diluted to 10–1,000 ppm. A total of 50  $\mu$ L of the standard mixture and 50  $\mu$ L of the internal reference (400  $\mu\text{g}/\text{mL}$  2-ethylbutyric acid) were mixed for gas-phase analysis to produce a standard curve, and the samples were calculated from the standard curve in mg/g.

### Method S3. Determination of metabolites in faces.

A total of 50 mg of solid sample was accurately weighed, and the metabolites were extracted using a 400  $\mu$ L methanol/water (4:1, v/v) solution. The mixture was allowed to settle at -20  $^{\circ}\text{C}$  and treated with a high-throughput tissue crusher, Wonbio-96c (Shanghai Wanbo biotechnology co., LTD), at 50 Hz for 6 min, followed by vortexing for 30 s and ultrasound at 40 kHz for 30 min at 5  $^{\circ}\text{C}$ . The samples were placed at -20  $^{\circ}\text{C}$  for 30 min to precipitate the proteins. After centrifugation at 13,000 g at 4  $^{\circ}\text{C}$  for 15 min, the supernatant was carefully transferred to sample vials for LC-MS/MS analysis.

Chromatographic separation of the metabolites was performed on a Thermo UHPLC system equipped with an ACQUITY BEH C18 column (100 mm  $\times$  2.1 mm i.d., 1.7  $\mu$ m; Waters, Milford, USA). The mobile phases consisted of 0.1% formic acid in water (solvent A) and 0.1% formic acid in acetonitrile/isopropanol (1:1, v/v) (solvent B). The solvent gradient changed according to the following conditions to equilibrate the systems: from 0 to 3 min, 95% (A): 5% (B) to 80% (A): 20% (B); from 3 to 9 min, 80% (A): 20% (B) to 5% (A): 95% (B); from 9 to 13 min, 5% (A): 95% (B) to 5% (A): 95% (B); from 13 to 13.1 min, 5% (A): 95% (B) to 95% (A): 5% (B); from 13.1 to 16 min, 95% (A): 5% (B) to 95% (A): 5% (B). The sample injection volume was 2  $\mu$ L, and the flow rate was set to 0.4 mL/min. The column temperature was maintained at 40 $^{\circ}\text{C}$ . During the period of analysis, all these samples were stored at 4  $^{\circ}\text{C}$ .

The mass spectrometric data were collected using a Thermo UHPLC-Q Exactive Mass Spectrometer equipped with an electrospray ionization (ESI) source operating in either positive or negative ion mode. The optimal conditions were set as follows: Aus gas heater temperature, 400  $^{\circ}\text{C}$ ; sheath gas flow rate, 40 psi; Aus gas flow rate, 30 psi; ion-spray voltage floating (ISVF), 2800 V in negative mode and 3500 V in positive mode; normalized collision energy, 20–40–60 V rolling for MS/MS. Data acquisition was performed with the Data-Dependent Acquisition (DDA) mode. The detection was carried out over a mass range of 70–1050 m/z.

After UPLC-TOF/MS analyses, the raw data were imported into the Progenesis QI 2.3 (Nonlinear Dynamics, Waters, USA) for peak detection and alignment. The preprocessing results generated a data matrix that consisted of the retention time (RT), mass-to-charge ratio

( $m/z$ ) values and peak intensity. Metabolic features detected at least 80 % in any set of samples retained. After filtering, minimum metabolite values were imputed for specific samples in which the metabolite levels fell below the lower limit of quantitation and metabolic features were normalized by sum. The internal standard was used for data QC (reproducibility). Metabolic features for which the relative standard deviation (RSD) of QC > 30% were discarded. Following normalization procedures and imputation, statistical analysis was performed on log-transformed data to identify significant differences in metabolite levels between comparable groups. Mass spectra of these metabolic features were identified using the accurate mass, MS/MS fragments spectra and isotope ratio difference found in reliable biochemical databases, such as the Human Metabolome Database (HMDB) (<http://www.hmdb.ca/>) and Metlin Database (<https://metlin.scripps.edu/>). Concretely, the mass tolerance between the measured  $m/z$  values and the exact mass of the components of interest was  $\pm 10$ ppm. For metabolites with MS/MS confirmation, only those with MS/MS fragment scores above 30 were considered as confidently identified. Otherwise, metabolites had only tentative assignments.

A multivariate statistical analysis was performed using the ropls (Version1.6.2, <http://bioconductor.org/packages/release/bioc/html/ropls.html>) R package from Bioconductor on Majorbio Cloud Platform (<https://cloud.majorbio.com>). Partial least-squares discriminate analysis (PLS-DA) was used for statistical analysis to determine global metabolic changes between comparable groups. All of the metabolite variables were scaled via Pareto scaling prior to conducting the PLS-DA. The model validity was evaluated from model parameters  $R^2$  and  $Q^2$ , which provide information for the interpretability and predictability, respectively, of the model and avoid the risk of overfitting. Variable importance in the projection (VIP) was calculated in the PLS-DA model.  $p$  values were estimated with paired Student's  $t$ -test on single-dimensional statistical analysis.

Statistical significance among groups were considered those with a VIP value greater than 1 and a  $p$  value less than 0.05 (FDR-corrected). Differential metabolites among the two groups were summarized, and mapped onto their biochemical pathways through metabolic enrichment and pathway analysis based on a database search (KEGG, <http://www.genome.jp/kegg/>). These metabolites can be classified according to the pathways they involve or the functions they perform. Enrichment analysis is the standard method for analyzing whether appears a group of metabolites appears in a function node or not. The principle is that the annotation analysis of a single metabolite develops into an annotation analysis of a group of metabolites. `scipy.stats` (Python packages) ( <https://docs.scipy.org/doc/scipy/> ) was used to identify statistically significantly enriched pathways using Fisher's exact test.
